# Supplementary material for: 2-(2-(Pyren-1-yl)-1H-benzo[d]imidazol-1-yl)-ethyl-4-methyl benzenesulfonate (PBITS) and its application for determination of bile acids by HPLC-FLD-MS
Source: Royal Society of Chemistry journal article supplement (doi:10.1039/c3ay40684a), 2013-11-28
Supplement: c3ay40684a.pdf [file c3ay40684a.pdf]

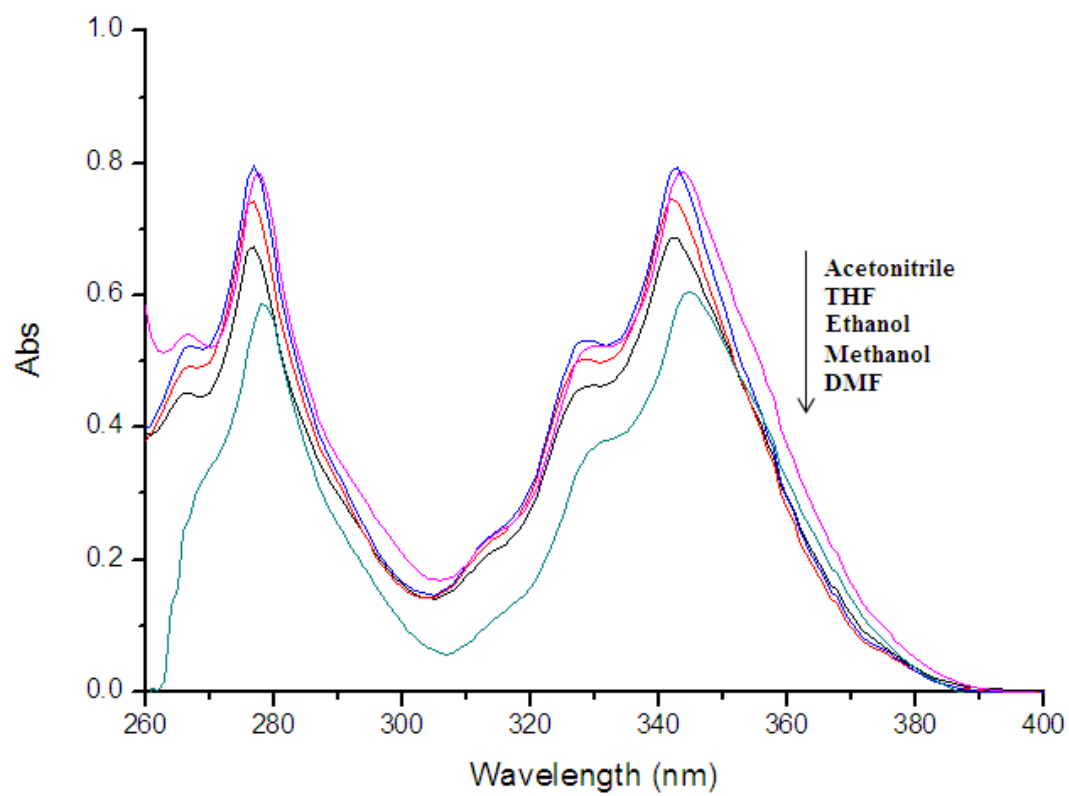

Fig.S1. The ultraviolet absorption spectra of PBITS-LCA in acetonitrile, THF, ethanol, methanol and DMF.

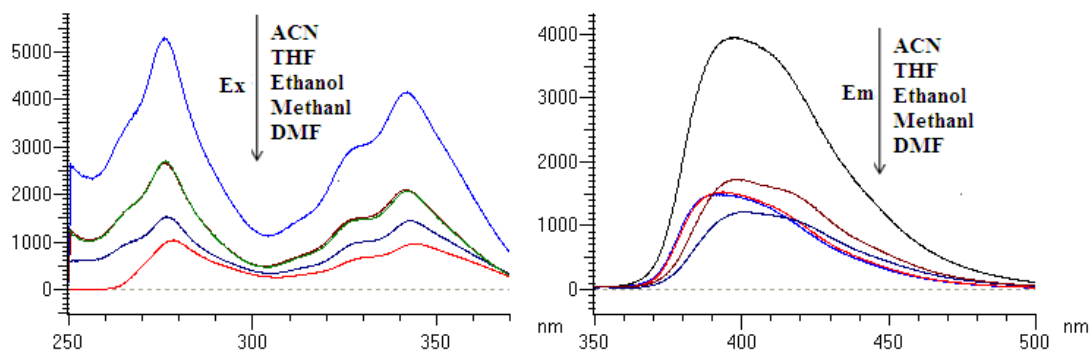

Fig.S2. The excitation and emission fluorescence spectra of PBITS-LCA in the five solvents

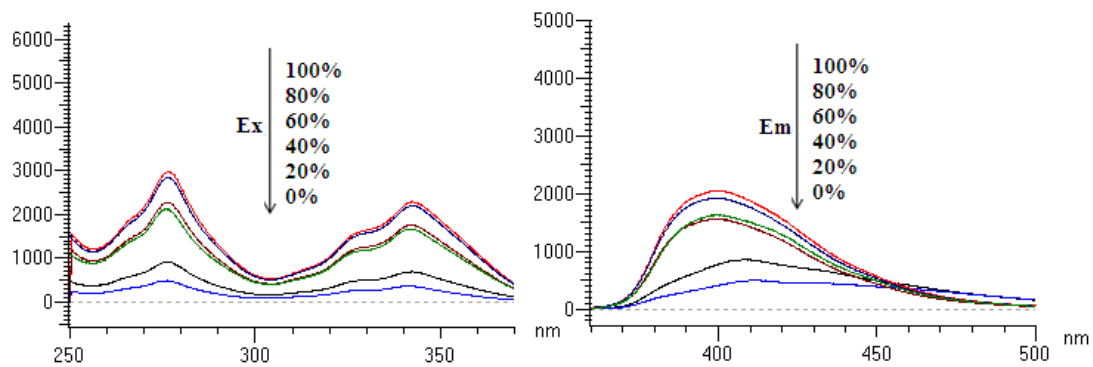

Fig.S3. The excitation and emission fluorescence spectra of PBITS-LCA in the acetonitrile solution (0-100%)

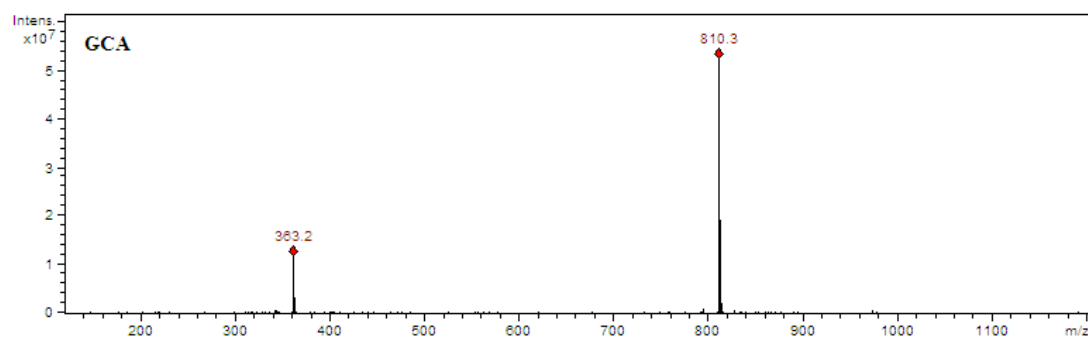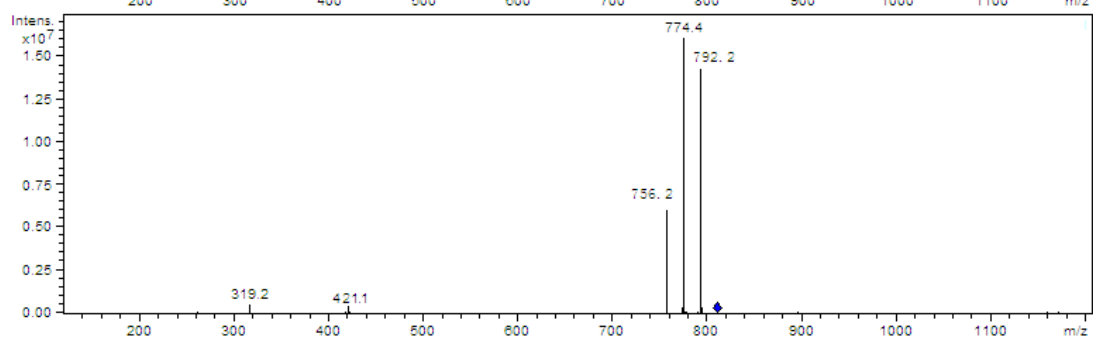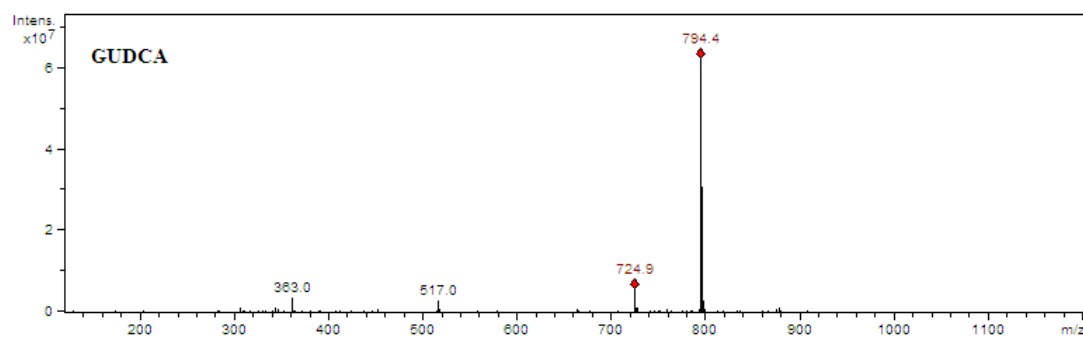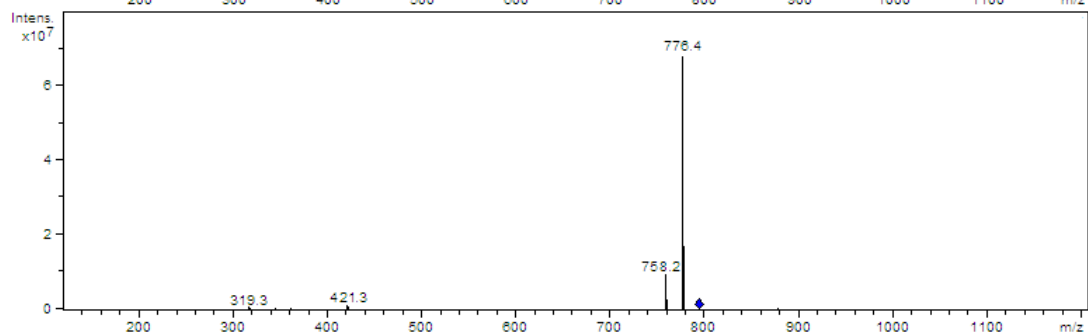

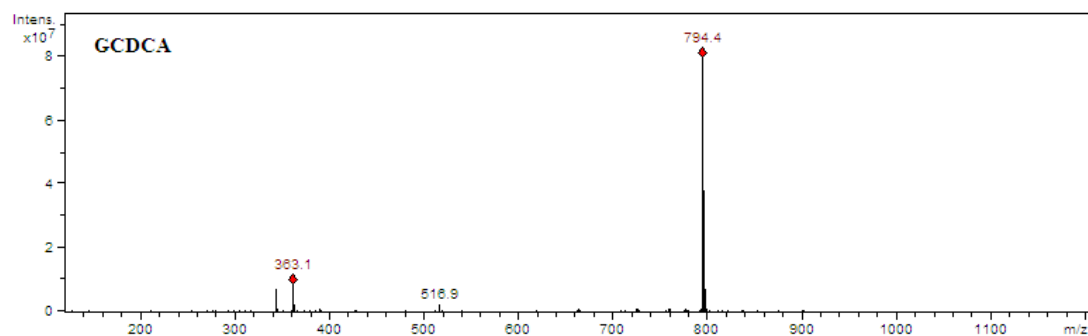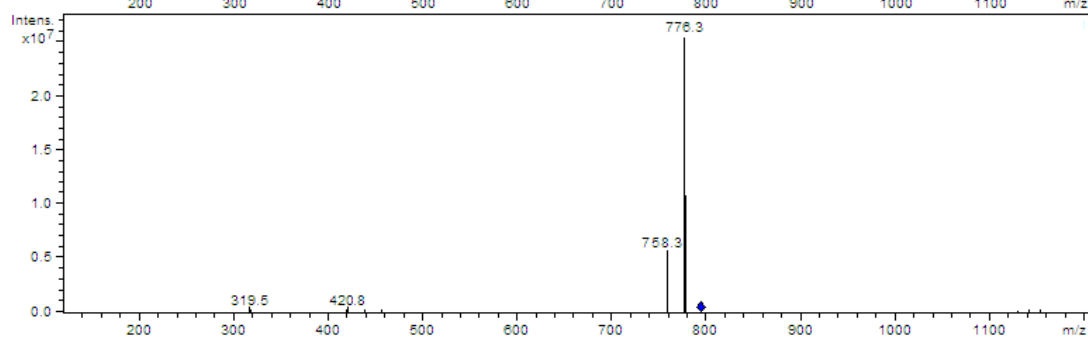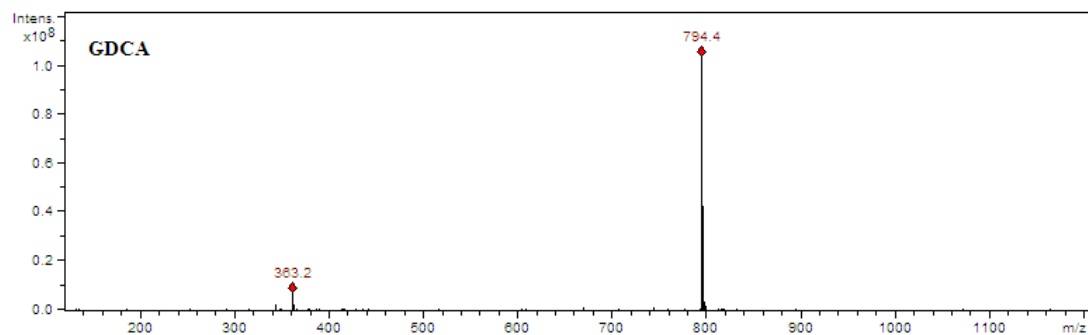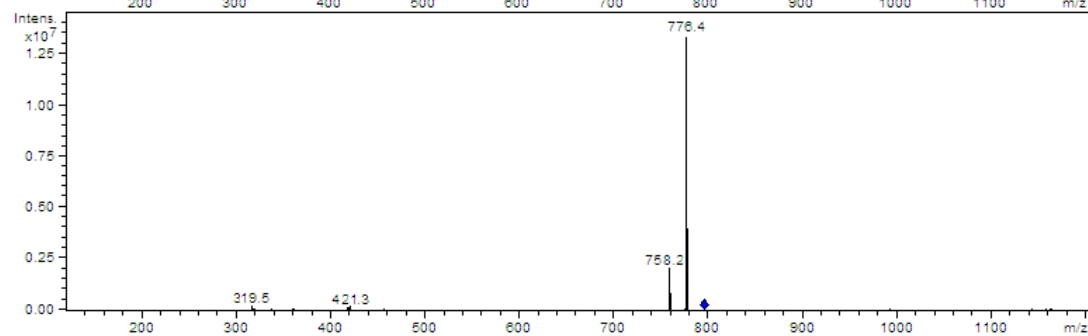

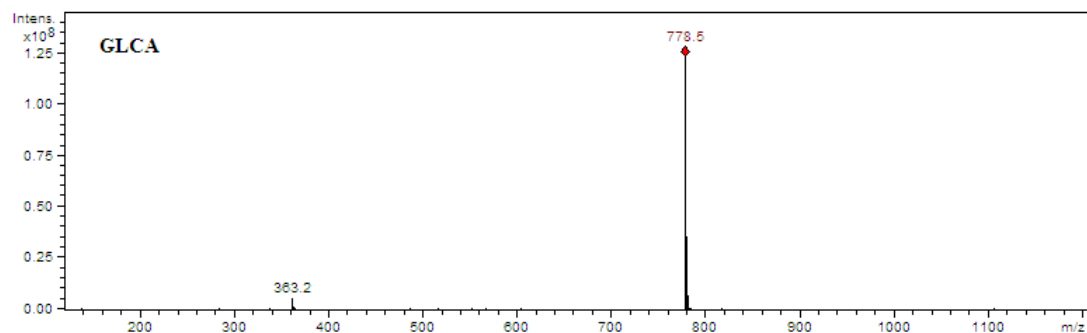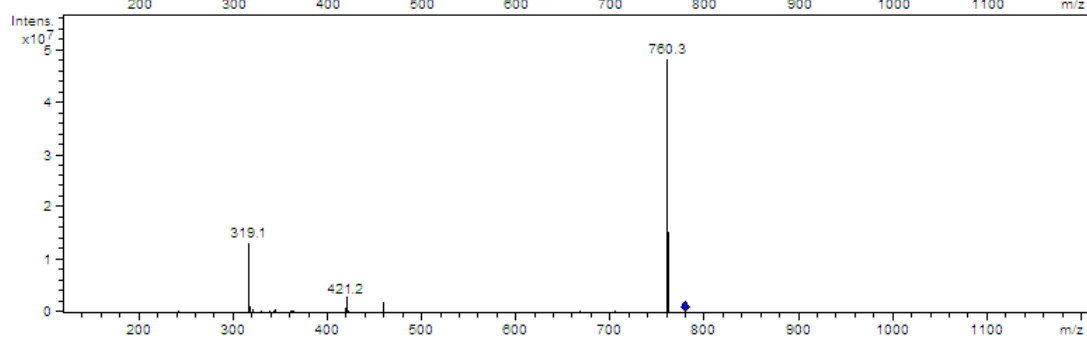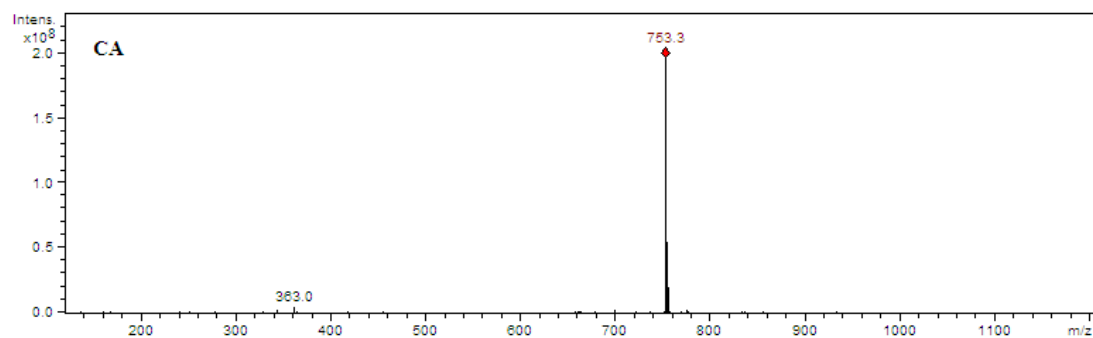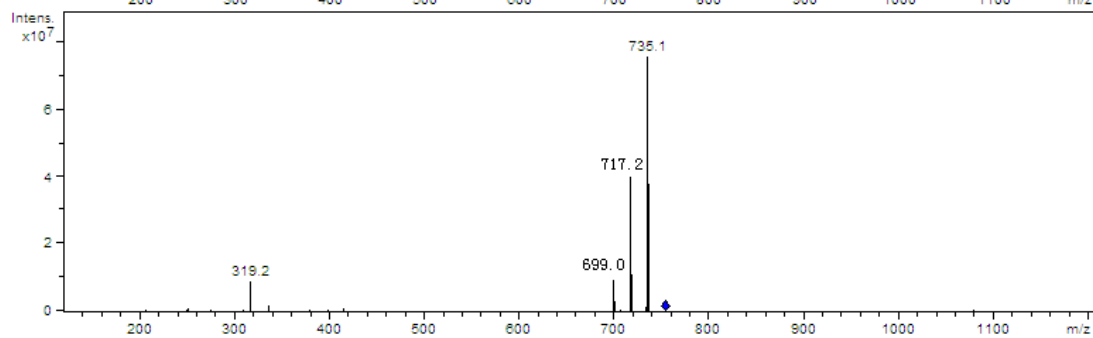

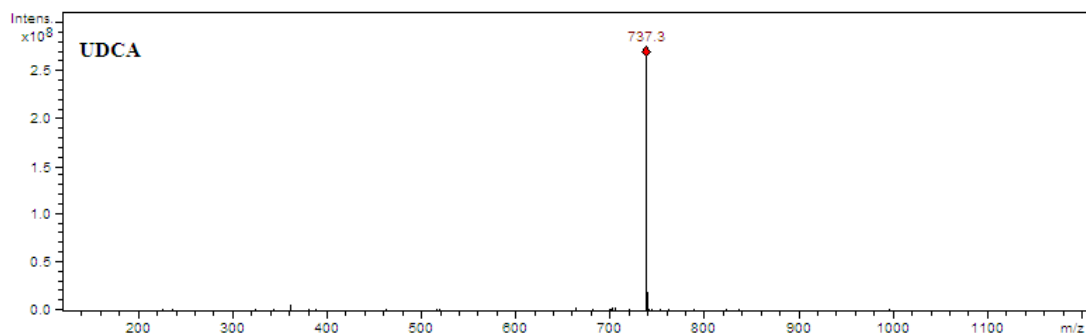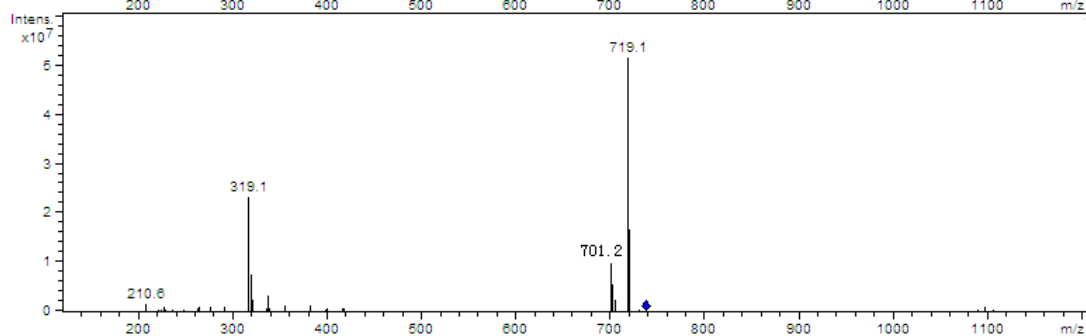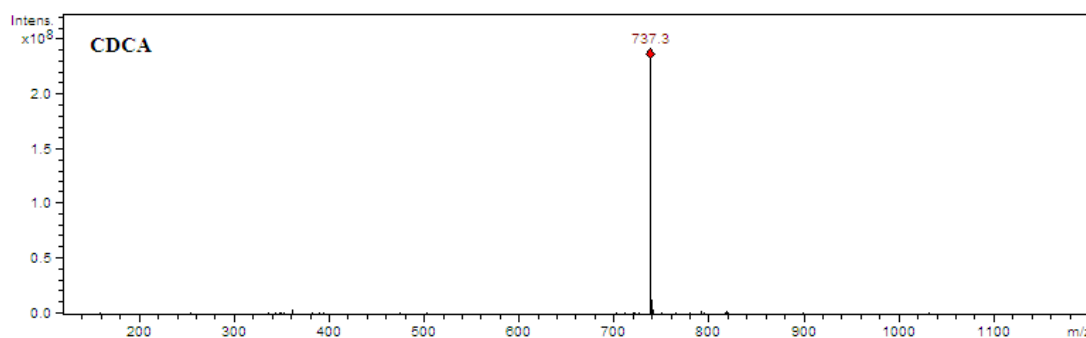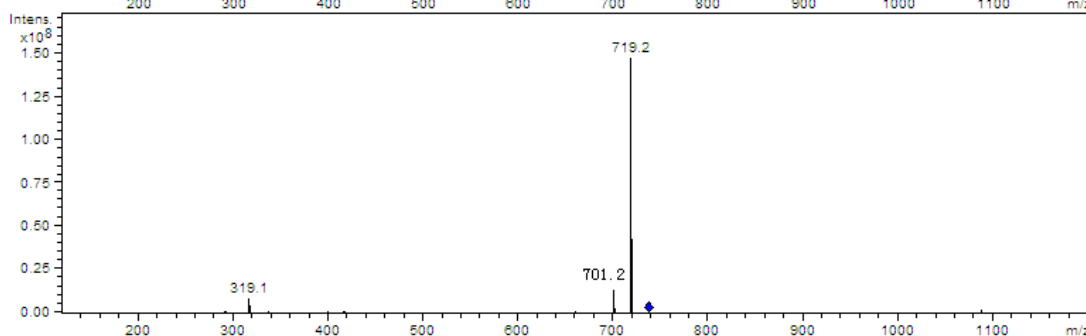

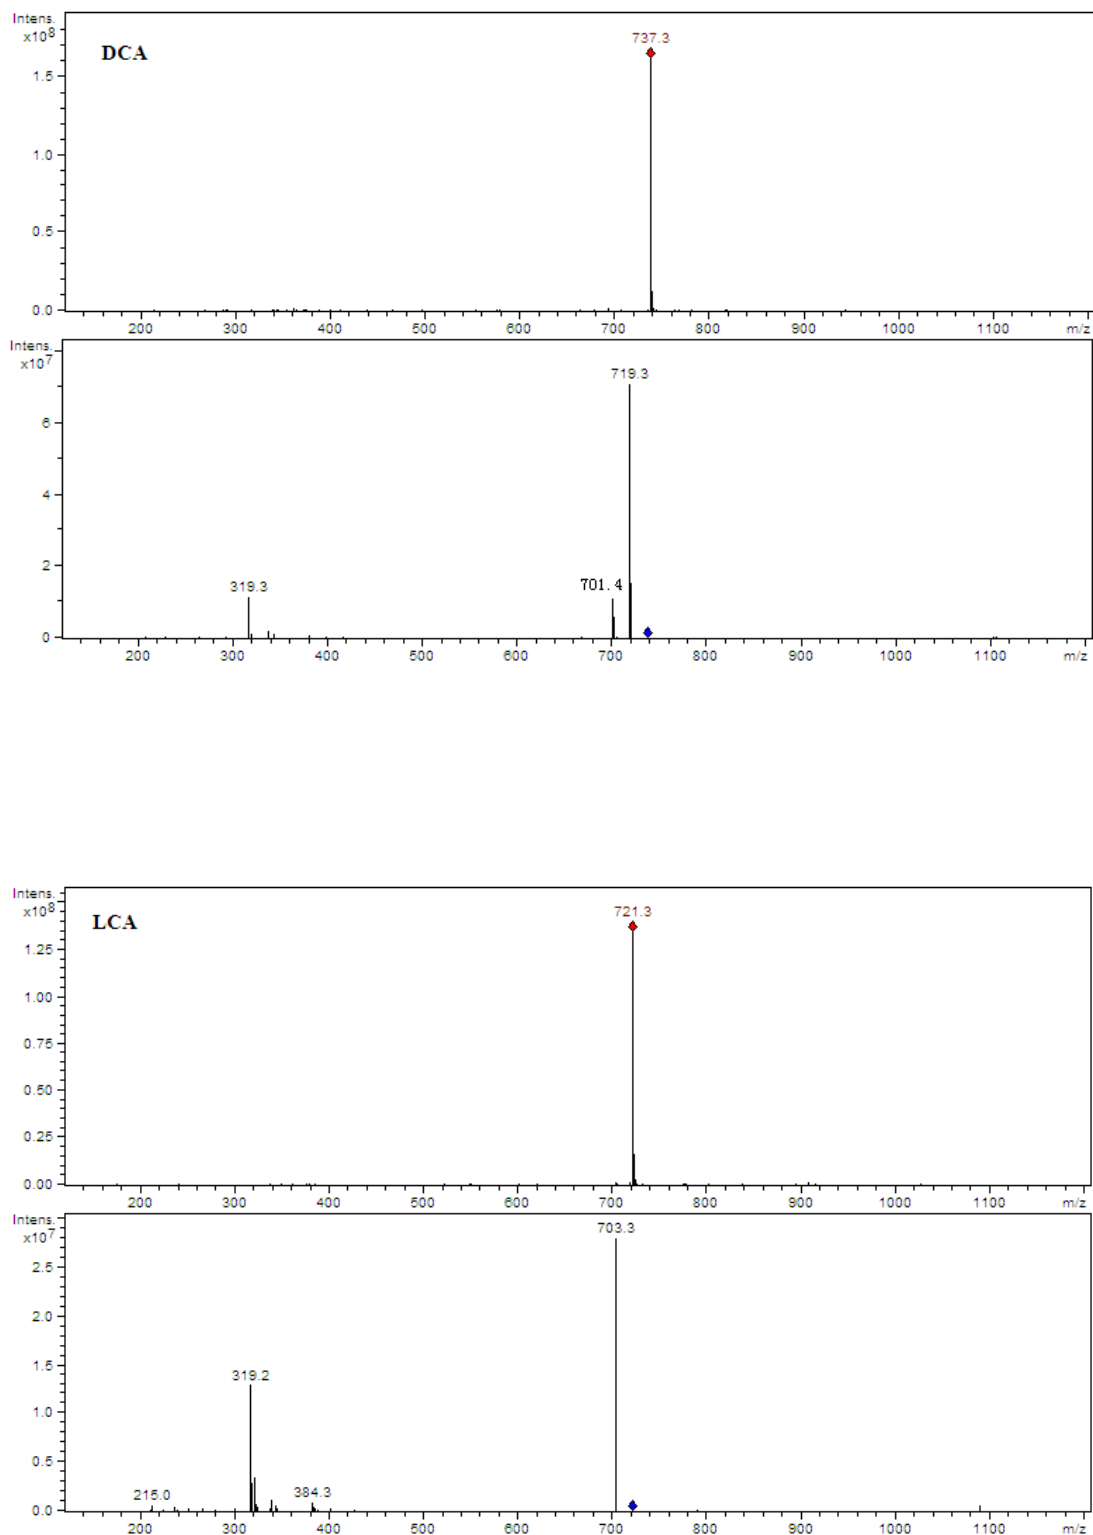

Fig.4-13. The MS and MS/MS spectra of the derivative PBITS-GCA, PBITS-GUDCA, PBITS-GCDCA, PBITS-GDCA, PBITS-GLCA, PBITS-CA, PBITS-UDCA, PBITS-CDCA, PBITS-DCA and PBITS-LCA.
